# Supplementary material for: Overwintering Cranes, Waders, and Shorebirds versus Ducks and Coots Showed Contrasting Long-Term Population Trends in Caohai Wetland in Guizhou Province, China
Source: MDPI journal article supplement (doi:10.3390/d15090985), 2023-09-01
Supplement: s1 [file s1]

Supplementary Materials

**Table S1.** Waterbird dataset and information sources from 1992-2012.

| Overwintering period | Species            | Individual abundance | Total abundance | Species numbers | Source                                           |
|----------------------|--------------------|----------------------|-----------------|-----------------|--------------------------------------------------|
| 1992/1993            | Black-necked crane | 330                  | 75573           | 32              | Chen, 2002; Li, 2005 [51,52]                     |
|                      | Common crane       | 296                  |                 |                 |                                                  |
| 1993/1994            | Black-necked crane | 463                  |                 |                 | Chen 2002; Li 2005 [51,52]                       |
|                      | Common crane       | 964                  |                 |                 |                                                  |
| 1994/1995            | Black-necked crane | 502                  |                 |                 | Chen, 2002; Li, 2005 [51,52]                     |
|                      | Common crane       | 631                  |                 |                 |                                                  |
| 1995/1996            | Black-necked crane | 535                  |                 |                 | Chen, 2002; Li, 2005; Li et al., 2014 [51,52,17] |
|                      | Common crane       | 483                  |                 |                 |                                                  |
|                      | Other waterbirds   | 74898                |                 |                 |                                                  |
| 1996/1997            | Black-necked crane | 512                  |                 |                 | Chen, 2002 [51]                                  |
|                      | Common crane       | 371                  |                 |                 |                                                  |
| 1997/1998            | Black-necked crane | 490                  |                 |                 | Chen, 2002 [51]                                  |
|                      | Common crane       | 402                  |                 |                 |                                                  |
| 1998/1999            | Black-necked crane | 504                  |                 |                 | Chen, 2002 [51]                                  |
|                      | Common crane       | 632                  |                 |                 |                                                  |
| 1999-2000            | Black-necked crane | 496                  |                 |                 | Chen, 2002 [51]                                  |
|                      | Common crane       | 604                  |                 |                 |                                                  |
| 2000-2001            | Black-necked crane | 484                  |                 |                 | Chen, 2002 [51]                                  |
|                      | Common crane       | 646                  |                 |                 |                                                  |
| 2001-2002            | Black-necked crane | 768                  |                 |                 | Chen, 2002 [51]                                  |
|                      | Common crane       | 553                  |                 |                 |                                                  |
|                      | Other waterbirds   | 1220                 |                 |                 |                                                  |
| 2002-2003            | Black-necked crane | 754                  |                 |                 | Li, 2003 [16]                                    |
|                      | Common crane       | 528                  |                 |                 |                                                  |
|                      | Other waterbirds   | 1531                 |                 |                 |                                                  |
| 2003-2004            | Black-necked crane | 779                  |                 |                 | Li, 2003 [16]                                    |
|                      | Common crane       | 514                  |                 |                 |                                                  |
|                      | Other waterbirds   | 11179                |                 |                 |                                                  |
| 2004-2005            | Black-necked crane | 864                  |                 |                 | Li,2004; Li, 2005 [53,54]                        |
|                      | Common crane       | 733                  |                 |                 |                                                  |
|                      | Other waterbirds   | 2265                 |                 |                 |                                                  |
| 2005-2006            | Black-necked crane | 1249                 | 55431           | 23              | Li et al., 2014[17]                              |
|                      | Common crane       | 767                  |                 |                 |                                                  |
|                      | Other waterbirds   | 53415                |                 |                 |                                                  |
| 2006-2007            | Black-necked crane | 1111                 |                 |                 | Crane synchronous investigation                  |
|                      | Common crane       | 1202                 |                 |                 |                                                  |
| 2007-2008            | Black-necked crane | 1194                 |                 |                 | Crane synchronous investigation                  |
|                      | Common crane       | 774                  |                 |                 |                                                  |
| 2009-2010            | Black-necked crane | 1131                 |                 |                 | Crane synchronous investigation                  |
|                      | Common crane       | 973                  |                 |                 |                                                  |
| 2010-2011            | Black-necked crane |                      |                 | 41              | Luo et al., 2012[55]                             |
|                      | Common crane       | 933                  |                 |                 |                                                  |
| 2011-2012            | Black-necked crane | 1194                 | 77269           | 33              | Li et al., 2014[17]                              |
|                      | Common crane       | 790                  |                 |                 |                                                  |
|                      | Other waterbirds   | 74682                |                 |                 |                                                  |

**Table S2.** Waterbirds recorded in 1996 and winter of 2022 at Caohai wetland, China , guilds, protection levels in China and IUCN threatened levels and population size(Mean±SD).

| Species                                                     | Guilds         | National protection level(China) | IUCN       | Population size |           |
|-------------------------------------------------------------|----------------|----------------------------------|------------|-----------------|-----------|
| Taiga Bean Goose( <i>Anser fabalis</i> )                    | Dabbling ducks | II                               | LC         | 127             |           |
| Greylag Goose( <i>Anser anser</i> )                         | Dabbling ducks |                                  | LC         | 3               |           |
| Bar-headed Goose( <i>Anser indicus</i> )                    | Dabbling ducks |                                  | LC         | 3547±3204       |           |
| Tundra Swan( <i>Cygnus columbianus</i> )                    | Dabbling ducks |                                  | LC         | 4±6             |           |
| Common Shelduck<br>( <i>Tadorna tadorna</i> )               | Dabbling ducks |                                  | LC         | 10±5            |           |
| Ruddy shelduck<br>( <i>Tadorna ferruginea</i> )             | Dabbling ducks |                                  | LC         | 5765±4921       |           |
| Gadwall( <i>Anas strepera</i> )                             | Dabbling ducks |                                  | LC         | 2602±2213       |           |
| Falcated Duck( <i>Anas falcata</i> )                        | Dabbling ducks |                                  | NT         | 825±2134        |           |
| Eurasian Wigeon<br>( <i>Anas penelope</i> )                 | Dabbling ducks |                                  | LC         | 3825±3970       |           |
| Mallard( <i>Anas platyrhynchos</i> )                        | Dabbling ducks |                                  | LC         | 1197±2142       |           |
| Spot-billed Duck( <i>Anas poecilorhyn-<br/>cha</i> )        | Dabbling ducks | II                               | LC         | 770±707         |           |
| Pintail( <i>Anas acuta</i> )                                | Dabbling ducks |                                  | LC         | 1063±944        |           |
| Common Teal( <i>Anas crecca</i> )                           | Dabbling ducks |                                  | LC         | 413±503         |           |
| Northern Shoveler( <i>Anas clypeata</i> )                   | Dabbling ducks |                                  | LC         | 164±173         |           |
| Garganey( <i>Anas querquedula</i> )                         | Dabbling ducks |                                  | LC         | 20              |           |
| <i>Baikal</i> Teal( <i>Sibirionetta formosa</i> )           | Dabbling ducks |                                  | LC         | 2               |           |
| Red-crested Pochard<br>( <i>Netta rufina</i> )              | Diving ducks   |                                  | LC         | 136             |           |
| Common Pochard( <i>Aythya ferina</i> )                      | Diving ducks   |                                  | I          | LC              | 1460±1661 |
| Baer's Pochard( <i>Aythya baeri</i> )                       | Diving ducks   |                                  |            | CR              | 38        |
| Ferruginous Duck( <i>Aythya nyroca</i> )                    | Diving ducks   |                                  |            | NT              | 107±94    |
| Tufted Duck( <i>Aythya fuligula</i> )                       | Diving ducks   | LC                               |            | 555±905         |           |
| <i>Common Goldeneye</i><br>( <i>Bucephala clangula</i> )    | Diving ducks   | II                               | LC         | 16              |           |
| <i>Smew</i><br>( <i>Mergus albellus</i> )                   | Diving ducks   |                                  | LC         | 4               |           |
| Common Merganser<br>( <i>Mergus merganser</i> )             | Diving ducks   |                                  | LC         | 107±115         |           |
| <i>Little Grebe</i><br>( <i>Podiceps ruficollis</i> )       | Shorebirds     |                                  | LC         | 547±913         |           |
| <i>Great Crested Grebe</i><br>( <i>Podiceps cristatus</i> ) |                |                                  | LC         | 131±216         |           |
| <i>Coot</i> ( <i>Fulica atra</i> )                          |                |                                  | LC         | 15568±10230     |           |
| <i>Brown-headed Gull</i><br>( <i>Larus brunnicephalus</i> ) |                |                                  | LC         | 27              |           |
| <i>Black-headed Gull</i><br>( <i>Larus ridibundus</i> )     |                |                                  | LC         | 604±993         |           |
| <i>Great Cormorant</i><br>( <i>Phalacrocorax carbo</i> )    |                |                                  | LC         | 243±359         |           |
| <i>Pied Avocet</i><br>( <i>Recurvirostra acosetta</i> )     |                |                                  | Shorebirds | LC              | 4         |
| <i>Northern Lapwing</i><br>( <i>Vanellus vanellus</i> )     |                | Shorebirds                       | LC         | 57±61           |           |
| <i>Grey-headed Lapwing</i><br>( <i>Vanellus cinereus</i> )  |                | Shorebirds                       | LC         | 49              |           |
| <i>Little Ringed Plover</i><br>( <i>Pluvialis fulva</i> )   |                | Shorebirds                       | LC         | 1               |           |
| <i>Pacific Golden Plover</i><br>( <i>Pluvialis fulva</i> )  | Shorebirds     | LC                               | 16         |                 |           |
| <i>Kentish Plover</i><br>( <i>Charadrius alexandrinus</i> ) | Shorebirds     | II                               | LC         | 2               |           |

| Species                                                   | Guilds       | National protection level(China) | IUCN | Population size |
|-----------------------------------------------------------|--------------|----------------------------------|------|-----------------|
| Pintail Snipe<br>( <i>Gallinago stenura</i> )             | Shorebirds   |                                  | LC   | 1               |
| Solitary( <i>Gallinago solitaria</i> )                    | Shorebirds   |                                  | LC   | 1               |
| Common Snipe<br>( <i>Gallinago Gallinago</i> )            | Shorebirds   |                                  | LC   | 16              |
| Spotted Redshank<br>( <i>Tringa erythropus</i> )          | Shorebirds   |                                  | LC   | 20±6            |
| Common Redshank<br>( <i>Tringa totanus</i> )              | Shorebirds   |                                  | LC   | 50              |
| Marsh Sandpiper<br>( <i>Tringa stagnatilis</i> )          | Shorebirds   |                                  | LC   | 1               |
| Common Greenshank<br>( <i>Tringa nebularia</i> )          | Shorebirds   |                                  | LC   | 116             |
| Green Sandpiper<br>( <i>Tringa ochropus</i> )             | Shorebirds   |                                  | LC   | 7±7             |
| Dunlin( <i>Gallinago solitaria</i> )                      | Shorebirds   |                                  | LC   | 1               |
| Eurasian Curlew<br>( <i>Numenius arquata</i> )            | Shorebirds   | II                               | NT   | 2               |
| Purple Swampphen<br>( <i>Porphyrio porphyrio</i> )        | Wading birds | II                               | LC   | 15±5            |
| Common Moorhen<br>( <i>Gallinula chloropus</i> )          | Wading birds |                                  | LC   | 362±365         |
| Common Crane<br>( <i>Grus grus</i> )                      | Wading birds | II                               | LC   | 821±351         |
| Black-necked Crane<br>( <i>Grus nigricollis</i> )         | Wading birds | I                                | NT   | 1367±573        |
| Black Stork<br>( <i>Ciconia nigra</i> )                   | Wading birds | I                                | LC   | 2               |
| Asian Openbill<br>( <i>Nastomus oscitans</i> )            | Wading birds |                                  | LC   | 135             |
| Eurasian Spoonbill<br>( <i>Platalea leucorodia</i> )      | Wading birds | II                               | LC   | 86              |
| Black-faced Spoonbill<br>( <i>Platalea minor</i> )        | Wading birds | I                                | EN   | 3               |
| Black-crowned Night Heron( <i>Nycticorax nycticorax</i> ) | Wading birds |                                  | LC   | 6               |
| Grey Heron( <i>Ardea cinerea</i> )                        | Wading birds |                                  | LC   | 256±244         |
| Chinese Pond Heron<br>( <i>Ardeola bacchus</i> )          | Wading birds |                                  | LC   | 2               |
| Great egret( <i>Egretta alba</i> )                        | Wading birds |                                  | LC   | 28±24           |
| Little Egret( <i>Egretta garzetta</i> )                   | Wading birds |                                  | LC   | 1262±1244       |
| Intermediate Egret<br>( <i>Egretta intermedia</i> )       | Wading birds |                                  | LC   | 3±3             |
| Cattle egret( <i>Bubulcus ibis</i> )                      | Wading birds |                                  | LC   | 17              |

Individual values indicate that only recorded 1~2 times, and the data differ greatly, we take the highest value as the population size .

**Table S3.** Parameter estimates for the three ways of the interpolation method presented in Supplementary.

| Interpolation method   | Parameters         | Estimate | F      | R <sup>2</sup> | P            | GCV   |
|------------------------|--------------------|----------|--------|----------------|--------------|-------|
| Geometric mean         | Total population   | 10.96    | 11.13  | 0.721          | 0.000564 *** | 0.050 |
|                        | Dabbling ducks     | 9.92     | 13.6   | 0.939          | 0.000589 *** | 0.022 |
|                        | Diving duck        | 7.63     | 24.71  | 0.955          | 2.73e-05 *** | 0.042 |
|                        | Wading birds       | 4.33     | 11.03  | 0.897          | <2e-16 ***   | 0.048 |
|                        | Shorebirds         | 7.61     | 43.03  | 0.958          | 0.0173 *     | 0.131 |
|                        | Coots              | 10.96    | 12.01  | 0.571          | 2e-16 ***    | 0.121 |
|                        | Black-necked Crane | 9.92     | 100.6  | 0.978          | 2e-16 ***    | 0.015 |
|                        | Common crane       | 7.63     | 6.052  | 0.497          | 0.00156 **   | 0.108 |
| Linear Regression      | Total population   | 10.94    | 17.32  | 0.816          | 7.31e-05 *** | 0.038 |
|                        | Dabbling ducks     | 9.91     | 23.99  | 0.963          | 7.12e-05 *** | 0.014 |
|                        | Diving duck        | 7.72     | 130.4  | 0.991          | <2e-16 ***   | 0.011 |
|                        | Wading birds       | 4.39     | 4.861  | 0.918          | 0.0395 *     | 0.039 |
|                        | Shorebirds         | 7.63     | 53.81  | 0.815          | <2e-16 ***   | 0.272 |
|                        | Coots              | 9.68     | 17.32  | 0.940          | 0.0016 **    | 0.089 |
|                        | Black-necked crane | 6.88     | 23.99  | 0.980          | 2e-16 ***    | 0.014 |
|                        | Common crane       | 6.59     | 130.4  | 0.489          | 0.00176 **   | 0.107 |
| Exponential regression | Total population   | 10.93    | 17.17  | 0.816          | 7.59e-05 *** | 0.037 |
|                        | Dabbling ducks     | 9.89     | 33.27  | 0.975          | 1.52e-05 *** | 0.011 |
|                        | Diving ducks       | 7.69     | 451.10 | 0.998          | 2e-16 ***    | 0.003 |
|                        | Wading birds       | 7.64     | 53.88  | 0.917          | 2e-16 ***    | 0.040 |
|                        | Shorebirds         | 4.32     | 10.26  | 0.949          | 0.0201 *     | 0.136 |
|                        | Coots              | 9.53     | 10.11  | 0.937          | 0.00193 **   | 0.091 |
|                        | Black-necked crane | 6.88     | 109.60 | 0.980          | <2e-16 ***   | 0.013 |
|                        | Common crane       | 6.59     | 5.98   | 0.488          | 0.0018 **    | 0.106 |

Note: The model with the smallest GCV value is optimal [56].
